# Supplementary material
Source: Springer Nature journal article supplement (https://www.springermedizin.de/resource/supplementary/13006_2014_185_MOESM1_ESM.pdf/9628158)

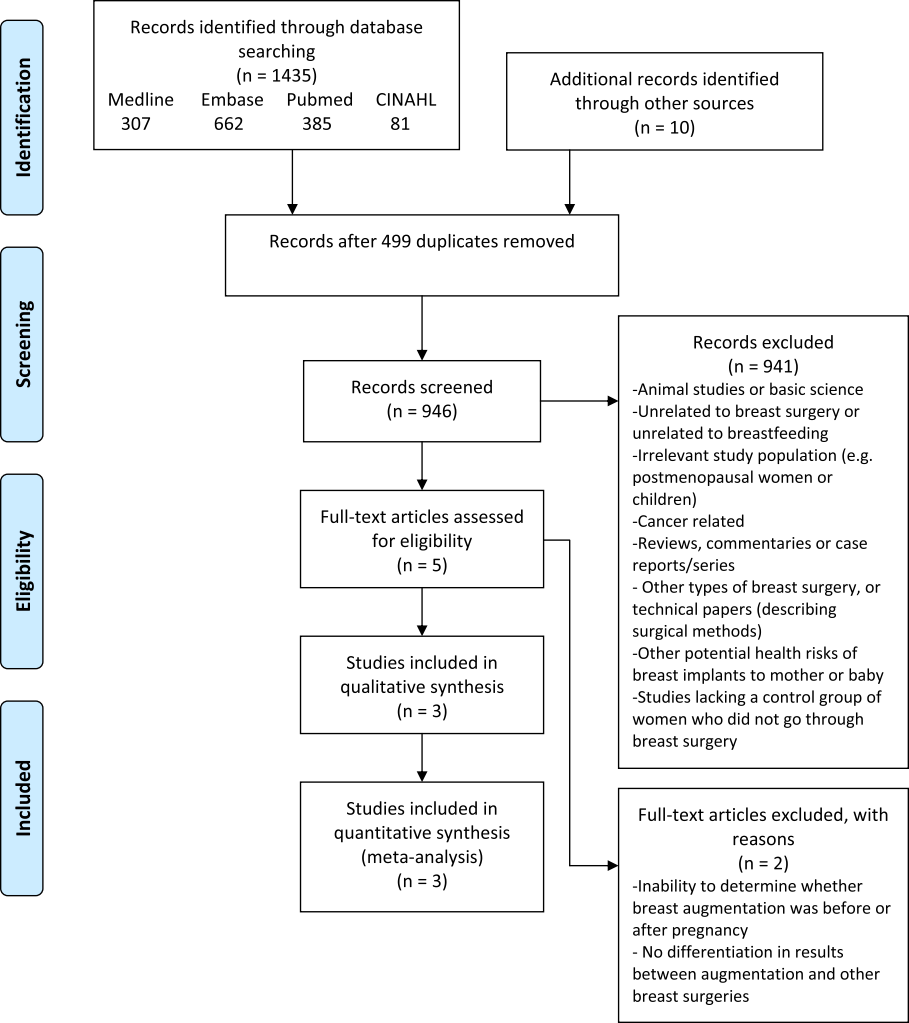

Supplement: MOESM1 [file 9628158]
